# Supplementary material for: Anoxygenic photosynthesis and the delayed oxygenation of Earth’s atmosphere
Source: PubMed Central journal article supplement (PMC6616575; doi:10.1038/s41467-019-10872-z), 2019-07-09
Supplement: 41467_2019_10872_MOESM1_ESM.pdf [file 41467_2019_10872_MOESM1_ESM.pdf]

*Supplementary Information for*

Anoxygenic photosynthesis and the delayed oxygenation of Earth's atmosphere

Kazumi Ozaki et al.

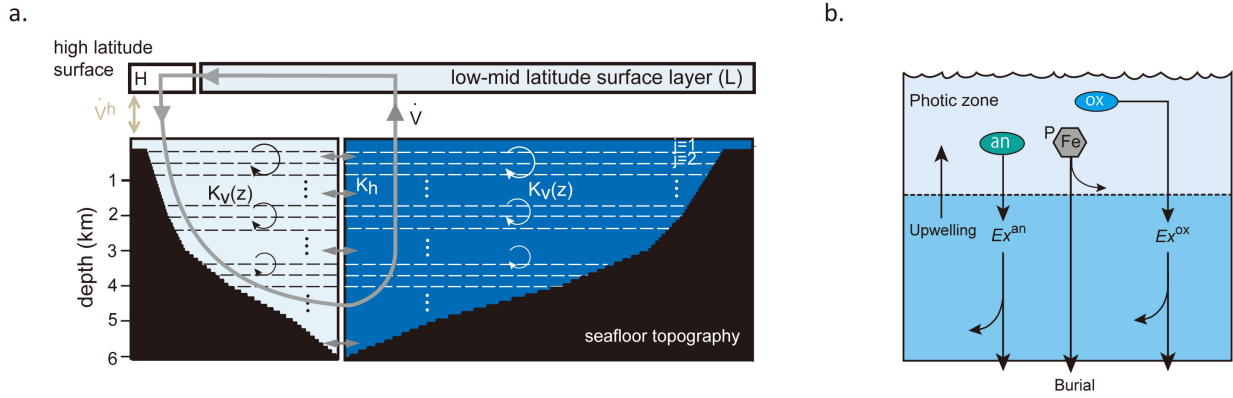

**Supplementary Figure 1.** Schematic figure of ocean configuration in the CANOPS-KB model (a). Ocean interior below the surface layers is divided into low-mid and high latitude sectors in the proportion of 0.75:0.25. Both sectors are vertically divided into 60 layers ( $j$ ) to a maximum depth of 6100 m, with a layer spacing of 100m. Each sector interacts with modern ocean bathymetry. The model includes water transport by thermohaline circulation ( $V$ ) and vertical/horizontal eddy diffusion ( $K_v$ ,  $K_h$ ). Shown in (b) is a schematic depiction of the competitive photosynthesis scheme discussed in the text, where ‘ox’ represents oxygenic phototrophs, ‘an’ represent anoxygenic phototrophs, ‘Fe’ shows iron oxides (with associated scavenged P), and  $Ex^i$  terms represent carbon export fluxes by oxygenic (ox) and anoxygenic (an) phototrophs.

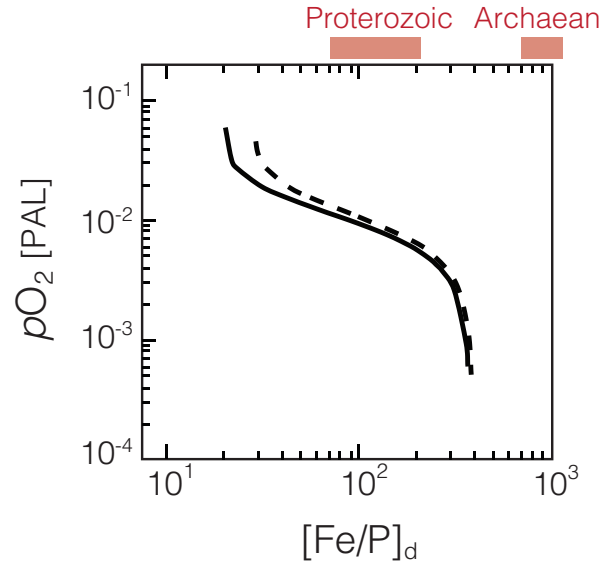

**Supplementary Figure 2.** Effect of varying phosphorus flux to the ocean on the stability analysis presented in the Main Text. Shown are equilibrium atmospheric  $pO_2$  values as a function of deep ocean Fe/P ratio ( $[Fe/P]_d$ ) for our reference case (solid) and a model ensemble in which we reduce phosphorus input by 50% (dashed). Note that in these simulations we also reduce global erosion rates (and thus organic carbon oxidation) by a similar factor (i.e.,  $f_w = 0.5$ ). Under the physically unrealistic assumption that these two factors are uncoupled, the equilibrium atmospheric  $pO_2$  under a given set of boundary conditions would be revised slightly downward.

**Supplementary Table 1.** Genes involved in phosphorus metabolism in *C. phaeoferrooxidans* strain KB01.

| <b>Gene</b>                                      | <b>Number of copies (ORF ID #)</b>                    |
|--------------------------------------------------|-------------------------------------------------------|
| PhoB (phosphate regulon response regulator)      | 2 (22_16), (113_3)                                    |
| PhoR (phosphate regulon sensor)                  | 1 (22_15)                                             |
| PhoU (phosphate uptake regulator)                | 5 (107_14), (62_3), (63_3), (63_4), (64_0)            |
| PhoH (phosphate starvation-inducible protein)    | 1 (58_9)                                              |
| PstC (phosphate ABC transporter)                 | 4 (107_11), (62_0), (63_0), (64_3)                    |
| PstA (phosphate ABC transporter)                 | 4 (107_12), (62_1), (63_1), (64_2)                    |
| PstB (phosphate transporter ATP-binding protein) | 4 (107_13), (62_2), (63_2), (64_1)                    |
| PstS (phosphate-binding protein)                 | 6 (113_1), (110_6), (107_10), (64_10), (90_4), (47_6) |
| Alkaline phosphatase (PhoA)                      | 2 (113_6), (44_1)                                     |
| Polyphosphate kinase                             | 2 (113_5), (44_19)                                    |

**Supplementary Table 2.** Parameter definitions and default parameter values for the 1-D water column model.

| <b>Parameter</b>           | <b>Description</b>                                | <b>Default Value</b> | <b>Units</b>                                  | <b>Source</b> |
|----------------------------|---------------------------------------------------|----------------------|-----------------------------------------------|---------------|
| <b>cyanobacteria</b>       |                                                   |                      |                                               |               |
| $\mu_c$                    | maximum growth rate                               | 0.004                | $\mu\text{molC kg}^{-1} \text{ s}^{-1}$       | 10            |
| $I_c$                      | half-saturation constant for light-limited growth | 98                   | $\mu\text{mol photons m}^{-2} \text{ s}^{-1}$ | 10            |
| $K_{c,P}$                  | half-saturation constant for nutrients            | 0.015                | $\mu\text{mol kg}^{-1}$                       | 10            |
| <b>photoferrotrophs</b>    |                                                   |                      |                                               |               |
| $\mu_p$                    | maximum growth rate                               | 0.002                | $\mu\text{molC kg}^{-1} \text{ s}^{-1}$       | This study    |
| $I_p$                      | half-saturation constant for light-limited growth | 1                    | $\mu\text{mol photons m}^{-2} \text{ s}^{-1}$ | 11            |
| $K_{p,Fe}$                 | half-saturation constant for dissolved Fe         | 11                   | $\mu\text{mol kg}^{-1}$                       | This study    |
| $K_{mp,P}$                 | half-saturation constant for nutrients            | 0.005                | $\mu\text{mol kg}^{-1}$                       | This study    |
| <b>physical parameters</b> |                                                   |                      |                                               |               |
| $T$                        | water temperature                                 | 25                   | $^{\circ}\text{C}$                            | -             |
| $I$                        | ionic strength                                    | 0.7                  | -                                             | -             |
| $I_0$                      | incident light flux                               | 1300                 | $\mu\text{mol photons m}^{-2} \text{ s}^{-1}$ | 10            |
| $1/\lambda$                | light attenuation length scale                    | 15                   | m                                             | 12            |
| $w$                        | upwelling rate                                    | 0.5                  | $\text{m d}^{-1}$                             | -             |
| $K_v$                      | eddy diffusivity                                  | $10^{-4}$            | $\text{m}^2 \text{ s}^{-1}$                   | -             |
| $K_d^{FeP}$                | distribution coefficient for P on Fe oxides       | 0.025                | $\mu\text{M}^{-1}$                            | 13            |

**Supplementary Table 3.** Major reactions in the CANOPS-KB model. OM represents  $(\text{CH}_2\text{O})_\alpha(\text{NH}_4^+)_\beta\text{H}_3\text{PO}_4$ .

| Process                            | Stoichiometry                                                                                                                                                                                                             |
|------------------------------------|---------------------------------------------------------------------------------------------------------------------------------------------------------------------------------------------------------------------------|
| Ammonia assimilation               | $\alpha\text{CO}_2 + \beta\text{NH}_4^+ + \text{H}_3\text{PO}_4 + \alpha\text{H}_2\text{O} \rightarrow \text{OM} + \alpha\text{O}_2$                                                                                      |
| Nitrate assimilation               | $\alpha\text{CO}_2 + \beta\text{NO}_3^- + \text{H}_3\text{PO}_4 + (\alpha + \beta)\text{H}_2\text{O} + 2\beta\text{H}^+ \rightarrow \text{OM} + (\alpha + 2\beta)\text{O}_2$                                              |
| Aerobic respiration                | $\text{OM} + \alpha\text{O}_2 \rightarrow \alpha\text{CO}_2 + \beta\text{NH}_4^+ + \text{H}_3\text{PO}_4 + \alpha\text{H}_2\text{O}$                                                                                      |
| Denitrification                    | $\text{OM} + \frac{4}{5}\alpha\text{NO}_3^- + \frac{4}{5}\alpha\text{H}^+ \rightarrow \alpha\text{CO}_2 + \beta\text{NH}_4^+ + \text{H}_3\text{PO}_4 + \frac{7}{5}\alpha\text{H}_2\text{O} + \frac{2}{5}\alpha\text{N}_2$ |
| Sulphate reduction                 | $\text{OM} + \frac{1}{2}\alpha\text{SO}_4^{2-} + \alpha\text{H}^+ \rightarrow \alpha\text{CO}_2 + \beta\text{NH}_4^+ + \text{H}_3\text{PO}_4 + \alpha\text{H}_2\text{O} + \frac{1}{2}\alpha\text{H}_2\text{S}$            |
| Nitrification                      | $\text{NH}_4^+ + 2\text{O}_2 \rightarrow \text{NO}_3^- + \text{H}_2\text{O} + 2\text{H}^+$                                                                                                                                |
| Aerobic H <sub>2</sub> S oxidation | $\Sigma\text{H}_2\text{S} + 2\text{O}_2 \rightarrow \text{SO}_4^{2-} + 2\text{H}^+$                                                                                                                                       |
|                                    | $\Sigma\text{H}_2\text{S} = \text{H}_2\text{S} + \text{HS}^-$                                                                                                                                                             |

**Supplementary Table 4.** Biogeochemical formulations used in the CANOPS-KB model.  $l$  and  $h$  represent low- and high-latitude surface layer, respectively.  $z$  is water depth, and  $w$  is upwelling rate at  $z = h_m$ .

| Parameter                          | Units                                   | Formulation                                                                                                                                                                                                            |
|------------------------------------|-----------------------------------------|------------------------------------------------------------------------------------------------------------------------------------------------------------------------------------------------------------------------|
| Total export production            | mol C m <sup>-2</sup> yr <sup>-1</sup>  | $J_{ex}^{total} = \alpha \cdot h_m \cdot \varepsilon \cdot [\text{PO}_4^{3-}] \cdot \frac{[\text{PO}_4^{3-}]}{K_m^P + [\text{PO}_4^{3-}]}$                                                                             |
| New production of photoferrotrophs | mol C m <sup>-2</sup> yr <sup>-1</sup>  | $J_{ex}^{pfe} = \min\left\{J_{Fe}^{up} / r_{FeC}, J_{ex}^{total\ l}\right\}$                                                                                                                                           |
| New production of cyanobacteria    | mol C m <sup>-2</sup> yr <sup>-1</sup>  | $J_{ex}^{cyano} = \begin{cases} J_{ex}^{total\ l} - J_{ex}^{pfe} & : \text{Fe-limit } (J_{ex}^{pfe} < J_{ex}^{total\ l}) \\ 0 & : \text{P-limit } (J_{ex}^{pfe} = J_{ex}^{total\ l}) \end{cases}$                      |
| Aerobic respiration                | mol C m <sup>-3</sup> yr <sup>-1</sup>  | $R_{O_2} = (\sum k_i G_i) \cdot \frac{[\text{O}_2]}{K_{O_2} + [\text{O}_2]}$                                                                                                                                           |
| Denitrification                    | mol C m <sup>-3</sup> yr <sup>-1</sup>  | $R_{deni} = (\sum k_i G_i) \cdot \frac{K'_{O_2}}{K'_{O_2} + [\text{O}_2]} \cdot \frac{[\text{NO}_3^-]}{K_{NO_3} + [\text{NO}_3^-]}$                                                                                    |
| Sulphate reduction                 | mol C m <sup>-3</sup> yr <sup>-1</sup>  | $R_{MSR} = (\sum k_i G_i) \cdot \frac{K'_{O_2}}{K'_{O_2} + [\text{O}_2]} \cdot \frac{K'_{NO_3}}{K'_{NO_3} + [\text{NO}_3^-]} \cdot \frac{[\text{SO}_4^{2-}]}{K_{SO_4} + [\text{SO}_4^{2-}]}$                           |
| Nitrification                      | mM yr <sup>-1</sup>                     | $R_{nitrif} = k_{NH_4} \cdot [\text{NH}_4^+] \cdot [\text{O}_2]$                                                                                                                                                       |
| Sulphide oxidation                 | mM yr <sup>-1</sup>                     | $R_{H_2S_{ox}} = k_{H_2S} \cdot [\text{SH}_2\text{S}] \cdot [\text{O}_2]$                                                                                                                                              |
| Fe(II) upwelling flux              | mol Fe m <sup>-2</sup> yr <sup>-1</sup> | $J_{Fe}^{up} = [\text{Fe/P}]_d \cdot J_P^{up}$                                                                                                                                                                         |
| P scavenging and burial            | mol P m <sup>-2</sup> yr <sup>-1</sup>  | $J_{scav} = \begin{cases} \gamma \cdot K_d^{FeP} \cdot [\text{PO}_4^{3-}]_l \cdot J_{Fe}^{up} & \text{when } [\text{O}_2]_{j=1} < 1 \mu\text{M} \\ 0 & \text{when } [\text{O}_2]_{j=1} \geq 1 \mu\text{M} \end{cases}$ |
| Phosphate upward flux              | mol P m <sup>-2</sup> yr <sup>-1</sup>  | $J_P^{up} = A_{j=1} w \cdot [\text{PO}_4^{3-}]_{j=1} + A_{j=1} K_v \left. \frac{\partial [\text{PO}_4^{3-}]}{\partial z} \right _{z=h_m}$                                                                              |
| C <sub>org</sub> burial efficiency | %                                       | $BE_{oc} = \frac{be_1 - be_2}{1 + SR/a} + be_2$                                                                                                                                                                        |
| P <sub>org</sub> burial efficiency | %                                       | $BE_{P_{org}} = BE_{oc}^* \cdot (1 + \exp(-0.001/SR))^{-1} \cdot \left( \alpha_p + (1 - \alpha_p) \frac{[\text{O}_2]_{bw}}{[\text{O}_2]_{bw}^*} \right)$                                                               |
| Fe-bound P burial                  | %                                       | $BE_{Fe\text{-bound}} = BE_{oc}^* \cdot (1 + \exp(-0.001/SR))^{-1} \cdot \frac{[\text{O}_2]_{bw}}{[\text{O}_2]_{bw}^*}$                                                                                                |
| Authigenic P burial                | %                                       | $BE_{auth} = 2 \cdot BE_{oc}^* \cdot (1 + \exp(-0.001/SR))^{-1}$                                                                                                                                                       |

**Supplementary Table 5.** Constants used in the CANOPS-KB model.

| Parameter                                                         | Symbol                                       | Units                            | Value                                                                                                    |
|-------------------------------------------------------------------|----------------------------------------------|----------------------------------|----------------------------------------------------------------------------------------------------------|
| <b>physical parameters</b>                                        |                                              |                                  |                                                                                                          |
| Ocean surface area                                                | $A$                                          | m <sup>2</sup>                   | $3.62 \times 10^{14}$                                                                                    |
| Coastal area ( $z < -200$ m)                                      | $A_{cs}$                                     | m <sup>2</sup>                   | $0.271 \times 10^{14}$                                                                                   |
| Surface area of high-latitude layer (H)                           | $A_h$                                        | m <sup>2</sup>                   | $3.62 \times 10^{13}$                                                                                    |
| Depth of mixed layer                                              | $h_m$                                        | m                                | 100                                                                                                      |
| Grid spacing                                                      | $\Delta z$                                   | m                                | 100                                                                                                      |
| Water depth of ocean bottom                                       | $z_b$                                        | m                                | 6100                                                                                                     |
| Ocean overturning rate                                            | $V$                                          | Sv                               | 20                                                                                                       |
| High-latitude convection                                          | $V_h$                                        | Sv                               | 57.4                                                                                                     |
| Horizontal diffusion coefficient                                  | $K_h$                                        | m <sup>2</sup> s <sup>-1</sup>   | 1000                                                                                                     |
| <b>biogeochemical parameters</b>                                  |                                              |                                  |                                                                                                          |
| Efficiency factor for phosphate uptake at L                       | $a_l$                                        | y <sup>-1</sup>                  | 1.0                                                                                                      |
| Efficiency factor for phosphate uptake at H                       | $a_h$                                        | y <sup>-1</sup>                  | 0.15                                                                                                     |
| Phosphate half saturation constant                                | $K_m^P$                                      | mM                               | $1 \times 10^{-6}$                                                                                       |
| Redfield ratio for C and P                                        | $\alpha$                                     | mol mol <sup>-1</sup>            | 106                                                                                                      |
| Redfield ratio for N and P                                        | $\beta$                                      | mol mol <sup>-1</sup>            | 16                                                                                                       |
| Fe/C stoichiometry of photoferrotrophy                            | $r_{FeC}$                                    | mol mol <sup>-1</sup>            | 4                                                                                                        |
| Distribution coefficient for phosphorus scavenging                | $K_d^{FeP}$                                  | mM <sup>-1</sup>                 | 70                                                                                                       |
| Preservation efficiency of scavenged P                            | $\gamma$                                     |                                  | 0.5                                                                                                      |
| POM sinking velocity                                              | $v_{POM}$                                    | m d <sup>-1</sup>                | 100                                                                                                      |
| Weight fraction of G <sub>1</sub>                                 | $f_{G1}$                                     |                                  | 0.72                                                                                                     |
| Weight fraction of G <sub>2</sub>                                 | $f_{G2}$                                     |                                  | 0.25                                                                                                     |
| Weight fraction of G <sub>3</sub>                                 | $f_{G3}$                                     |                                  | 0.03                                                                                                     |
| Decomposition rate of G <sub>1</sub>                              | $k_1$                                        | d <sup>-1</sup>                  | 0.6                                                                                                      |
| Decomposition rate of G <sub>2</sub>                              | $k_2$                                        | d <sup>-1</sup>                  | 0.1                                                                                                      |
| Decomposition rate of G <sub>3</sub>                              | $k_3$                                        | d <sup>-1</sup>                  | 0.0                                                                                                      |
| Aerobic respiration of O <sub>2</sub> half saturation constant    | $K_{O_2}$                                    | mM                               | $8 \times 10^{-3}$                                                                                       |
| Denitrification half saturation constant                          | $K_{NO_3}$                                   | mM                               | $3 \times 10^{-2}$                                                                                       |
| Half saturation constant for sulphate reduction                   | $K_{SO_4}$                                   | mM                               | 0                                                                                                        |
| Ammonium oxidation rate                                           | $k_{NH_4}$                                   | mM <sup>-1</sup> y <sup>-1</sup> | $1.825 \times 10^4$                                                                                      |
| Sulphide oxidation rate                                           | $k_{H_2S}$                                   | mM <sup>-1</sup> y <sup>-1</sup> | $3.65 \times 10^3$                                                                                       |
| Riverine reactive phosphorus input rate                           | $R_P$                                        | Tmol P y <sup>-1</sup>           | 0.18                                                                                                     |
| Riverine nitrogen input rate                                      | $R_N$                                        | Tg N y <sup>-1</sup>             | 0                                                                                                        |
| Atmospheric nitrogen deposition                                   | $A_N$                                        | Tg N <sup>-1</sup>               | 0                                                                                                        |
| Baseline C <sub>org</sub> weathering flux                         | $J_{w,org}$                                  | Tmol C y <sup>-1</sup>           | 10.5                                                                                                     |
| C <sub>org</sub> burial limit at zero sedimentation               | $be_1$                                       | %                                | 0.5 for [O <sub>2</sub> ] <sub>bw</sub> > 200 μM<br>50 for [O <sub>2</sub> ] <sub>bw</sub> < 30 μM       |
| C <sub>org</sub> burial limit at infinite sedimentation           | $be_2$                                       | %                                | 75                                                                                                       |
| Center of regression for C <sub>org</sub> burial efficiency       | $a$                                          | cm y <sup>-1</sup>               | 0.264 for [O <sub>2</sub> ] <sub>bw</sub> > 200 μM<br>0.0038 for [O <sub>2</sub> ] <sub>bw</sub> < 30 μM |
| Reference bottom water O <sub>2</sub> for P burial                | [O <sub>2</sub> ] <sub>bw</sub> <sup>*</sup> | μM                               | 250                                                                                                      |
| Constant for O <sub>2</sub> dependence on P <sub>org</sub> burial | $\alpha_P$                                   | -                                | 0.25                                                                                                     |



## Supplementary References

- 1 Rao, N. & Torriani, A. Molecular aspects of phosphate transport in *Escherichia coli*. *Molecular Microbiology* **4**, 1083-1090 (1990).
- 2 Neidhardt, F. C. *Escherichia coli and Salmonella: Cellular and Molecular Biology*. (ASM Press, 1996).
- 3 Agüena, M. & Spira, B. Transcriptional processing of the *pst* operon of *Escherichia coli*. *Current Microbiology* **58**, 264-267 (2009).
- 4 Adams, M. M., Gómez-García, M. R., Grossman, A. R. & Bhaya, T. Phosphorus deprivation responses and phosphonate utilization in a thermophilic *Synechococcus* sp. from microbial mats. *J Bacteriol* **190**, 8171-8184 (2008).
- 5 Lidbury, I. D., Fraser, T., Murphy, A. R., Scanlan, D. J., Bending, G. D., Jones, A. M., Moore, J. D., Goodall, A., Tibbett, M. & Hammond, J. P. The 'known' genetic potential for microbial communities to degrade organic phosphorus is reduced in low-pH soils. *MicrobiologyOpen* **6**, 4 (2017).
- 6 Canfield, D. E. The early history of atmospheric oxygen: Homage to Robert M. Garrels. *Ann. Rev. Earth Planet. Sci.* **33**, 1-36 (2005).
- 7 Kump, L. R. & Garrels, R. M. Modeling atmospheric O<sub>2</sub> in the global sedimentary redox cycle. *Am. J. Sci.* **286**, 337-360 (1986).
- 8 Catling, D. C., Zahnle, K. J. & McKay, C. P. Biogenic methane, hydrogen escape, and the irreversible oxidation of early life. *Science* **293**, 839-843 (2001).
- 9 Bolton, E. W., Berner, R. A. & Petsch, S. T. The weathering of sedimentary organic matter as a control on atmospheric O<sub>2</sub>: II. Theoretical modeling. *American Journal of Science* **306**, 575-615 (2006).
- 10 Denaro, G., Valenti, D., Spagnolo, B., Basilone, G., Mazzola, S., Zgozi, S. W., Aronica, S. & Bonanno, A. Dynamics of two picophytoplankton groups in Mediterranean Sea: Analysis of the deep chlorophyll maximum by a stochastic advection-reaction-diffusion model. *Plos One* **8**, e66765 (2013).
- 11 Manske, A. K., Glaeser, J., Kuypers, M. M. M. & Overmann, J. Physiology and phylogeny of green sulfur bacteria forming a monospecific phototrophic assemblage at a depth of 100 meters in the Black Sea. *Appl Environ Microb* **71**, 8049-8060 (2005).
- 12 Vaulot, D., Marie, D., Olson, R. J. & Chisholm, S. W. Growth of *Prochlorococcus*, a photosynthetic prokaryote, in the equatorial Pacific Ocean. *Science* **268**, 1480-1482 (1995).
- 13 Jones, C., Nomosatryo, S., Crowe, S. A., Bjerrum, C. J. & Canfield, D. E. Iron oxides, divalent cations, silica, and the early earth phosphorus crisis. *Geology* **43**, 135-138 (2015).
